# Supplementary material for: Separation of impurities from solution by selective co-crystal formation
Source: Royal Society of Chemistry journal article supplement (doi:10.1039/c1ce06358h), 2011-11-17
Supplement: c1ce06358h.pdf [file c1ce06358h.pdf]

## Supplementary Information

Powder patterns of IBU, KETO, and BIPY

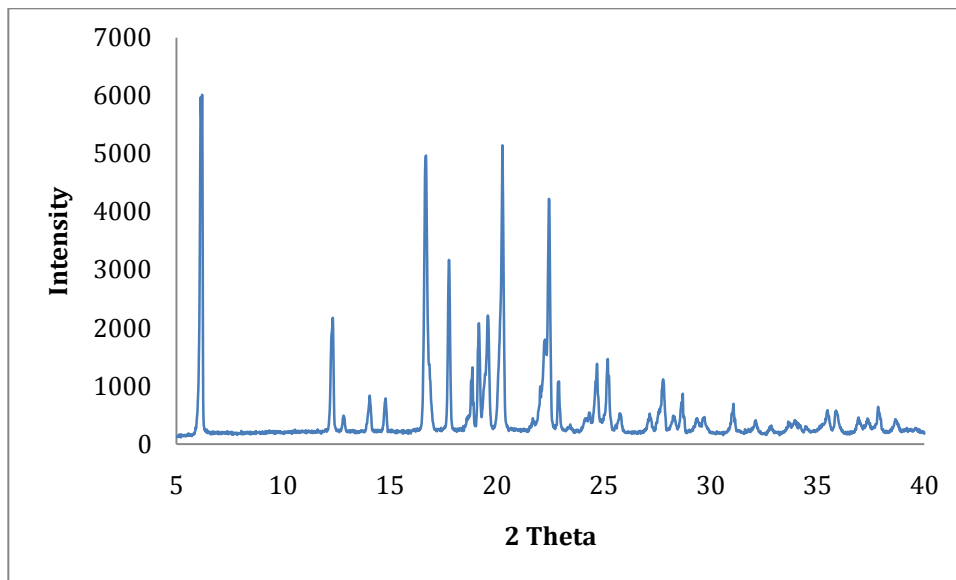

Figure 1 X-ray Powder Diffraction of IBU

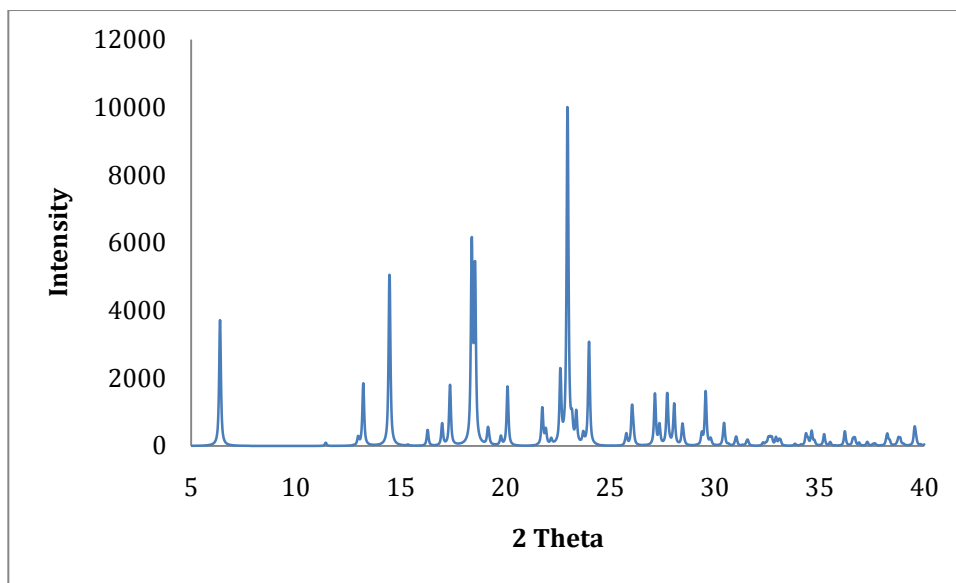

Figure 2 X-ray Powder Diffraction of KETO

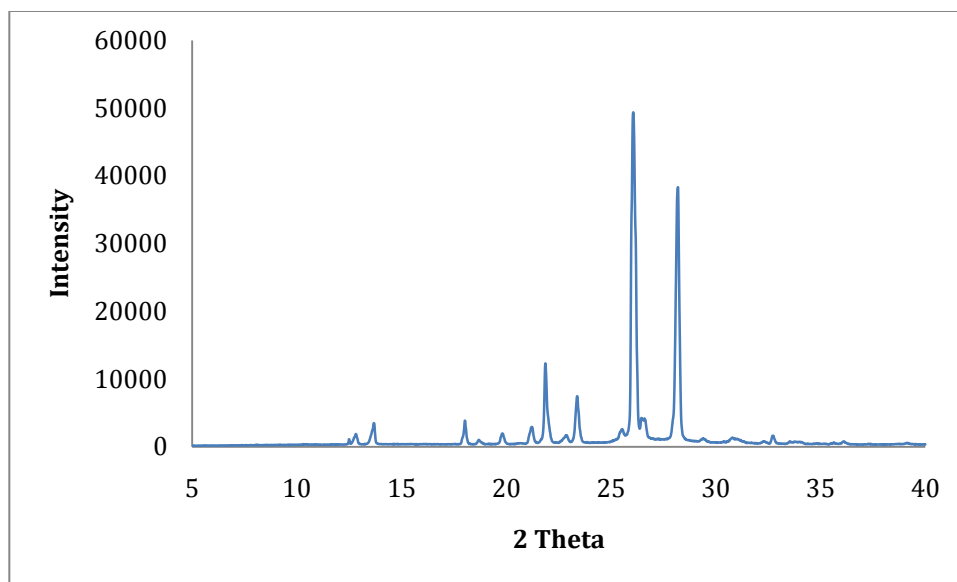

Figure 3 X-ray Powder Diffraction of BIPY
